# Supplementary material for: In vitro Models of Breast Cancer Metastatic Dormancy
Source: PubMed Central journal article supplement (PMC7062644; doi:10.3389/fcell.2020.00037), 2020-03-03
Supplement: Table_2.pdf [file Table_2.pdf]

**Supplementary Table 2. Organotypic *in vitro* systems for the study of metastatic dormancy.**

| Description                                                                                                                                                                                                                                                                                                                                                                                                                            | Stromal cells                                                                                                                                                                                                                | Breast cancer cells tested                               | Validation strategies                                                                              | Refs.                                          |
|----------------------------------------------------------------------------------------------------------------------------------------------------------------------------------------------------------------------------------------------------------------------------------------------------------------------------------------------------------------------------------------------------------------------------------------|------------------------------------------------------------------------------------------------------------------------------------------------------------------------------------------------------------------------------|----------------------------------------------------------|----------------------------------------------------------------------------------------------------|------------------------------------------------|
| <i>Bone</i>                                                                                                                                                                                                                                                                                                                                                                                                                            |                                                                                                                                                                                                                              |                                                          |                                                                                                    |                                                |
| 3D-collagen biomatrix seeded with human bone marrow stromal cells. Matrixes with defined stromal composition provided reversible growth arrest signals <i>in vitro</i> and upon implantation <i>in vivo</i> (inhibitory niche). Specific inhibition of RTK, Alk5, and p38 signaling in the inhibitory niche results in increased proliferation of BCCs without affecting stromal cells.                                                | Supportive niche:<br>Primary human mesenchymal stem cells<br>Inhibitory niche:<br>hFOBs (human foetal osteoblasts)<br>HS-5 (human mesenchymal cells of bone marrow origin)<br>HUVEC (human umbilical cord endothelial cells) | SUM149,<br>SUM159, MDA-MB-231, BT474, MCF7, T47D, ZR75-1 | Reversible growth arrest, Ki67 staining, cell cycle arrest markers (p21, p27), response to signals | Marlow et al., 2013; McGrath et al., 2019      |
| BCCs are added together with laminin-rich ECM to human microvasculature niche. Within this system, BCCs show heterogeneous behavior, with cells adjacent to mature capillaries remaining dormant (via TSP-1), and cells growing closer to neovascular tips due to expression of POSTN and TGFβ1. This <i>in vitro</i> model has been further utilized to dissect signals that sustain chemoresistance of dormant BCCs <i>in vivo</i> . | HUVEC (human umbilical cord endothelial cells)<br>Primary human mesenchymal stem cells                                                                                                                                       | HMT-3522-T4-2, MCF7, MDA-MB-231                          | Reversible growth arrest, Ki67 staining, cell cycle arrest markers, response to signals            | Ghajar et al., 2013; Carlson et al., 2019      |
| Osteoblasts can be cultivated for several weeks in a bioreactor forming a multilayered bone-like structure as substrate for BCCs. Bone remodeling cytokines have been shown to drive proliferation of quiescent BCCs in this organotypic model.                                                                                                                                                                                        | MC3T3-E1 (mouse calvariaosteoblasts)<br>NH0st (human osteoblasts)<br>hFOBs (human foetal osteoblasts)                                                                                                                        | MDA-MB-231<br>BRMS1, MCF7                                | Reversible growth arrest, Ki67, response to signals                                                | Dhurjati et al., 2006; Sosnoski et al., 2015   |
| <i>Liver</i>                                                                                                                                                                                                                                                                                                                                                                                                                           |                                                                                                                                                                                                                              |                                                          |                                                                                                    |                                                |
| Polystyrene (or hydrogel) scaffold and coated with collagen I, then primary hepatocytes and non-hepatocytes liver stromal cells are added and allowed to form the organ-like system. The system has been validated by testing proliferative signals (such as LPS) and exploited to uncover potential biomarkers released from the stroma in response to disseminated BCCs.                                                             | Primary human hepatocytes and non-hepatocytes                                                                                                                                                                                | MDA-MB-231, MCF7                                         | Reversible growth arrest, Ki67/EdU, cell shape, response to signals                                | Wheeler et al., 2014; Clark et al., 2016, 2018 |
| <i>Lung</i>                                                                                                                                                                                                                                                                                                                                                                                                                            |                                                                                                                                                                                                                              |                                                          |                                                                                                    |                                                |
| Alveolar type1-like cells, alveolar type2-like cells and lung fibroblasts are cultured with mitogen and nutrient low medium on an air-permeable surface to recreate the gas flow through the alveolar wall.                                                                                                                                                                                                                            | TT1 (human type-1 pneumocytes)<br>H441 cells (human lung adenocarcinoma type-2 pneumocytes)<br>Human lung fibroblasts                                                                                                        | D2.OR, D2.A1, MCF7, T47D-DBM, 4T07                       | Reversible growth arrest, Ki67 staining, cell shape, gene expression, response to signals          | Montagner et al., 2020                         |
